# Supplementary material for: Use of Targeted High-Throughput Sequencing for Genetic Classification of Patients with Bleeding Diathesis and Suspected Platelet Disorder
Source: PubMed Central journal article supplement (PMC6524924; doi:10.1055/s-0038-1676813), 2018-12-30
Supplement: 10-1055-s-0038-1676813-s180050.pdf [file 10-1055-s-0038-1676813-s180050.pdf]

# Use of targeted high-throughput sequencing for genetic classification of patients with bleeding diathesis and suspected platelet disorder

Oliver Andres, Eva-Maria König, Karina Althaus, Tamam Bakchoul, Peter Bugert, Stefan Eber,  
Ralf Knöfler, Erdmute Kunstmann, Georgi Manukjan, Oliver Meyer, Gabriele Strauß, Werner Streif,  
Thomas Thiele, Verena Wiegering, Eva Klopocki, and Harald Schulze.

## Supplementary Tables

**Supplementary Table 1. Panel design of the 59 genes (in alphabetical order within five functional groups).**

| Functional group                      | Gene                               | Transcripts                                                                 | Mode of inheritance <sup>A</sup> |
|---------------------------------------|------------------------------------|-----------------------------------------------------------------------------|----------------------------------|
| Transcription regulation              | <i>ANKRD26<sup>B</sup></i>         | NM_014915.2                                                                 | AD                               |
|                                       | <i>FLI1</i>                        | NM_001271012.1; NM_001271010.1; NM_002017.4                                 | AD; AR                           |
|                                       | <i>GATA1</i>                       | NM_002049.3                                                                 | XLR                              |
|                                       | <i>GFI1B</i>                       | NM_004188.6                                                                 | AD; AR                           |
|                                       | <i>HOXA11</i>                      | NM_005523.5                                                                 | AD                               |
|                                       | <i>JAK2</i>                        | NM_004972.3                                                                 | AD                               |
|                                       | <i>MPL</i>                         | NM_005373.2                                                                 | AR                               |
|                                       | <i>RBM8A<sup>B</sup></i>           | NM_005105.4                                                                 | AR                               |
|                                       | <i>ROCK1</i>                       | NM_005406.2                                                                 | n. a.                            |
|                                       | <i>RUNX1</i>                       | NM_001754.4; NM_001001890.2; NM_001122607.1                                 | AD                               |
|                                       | <i>THPO</i>                        | NM_001290028.1                                                              | AD                               |
| Cytoskeleton structure and regulation | <i>ACTN1</i>                       | NM_001130004.1                                                              | AD                               |
|                                       | <i>DIAPH1</i>                      | NM_005219.4                                                                 | AD                               |
|                                       | <i>DNM2</i>                        | NM_001005360.2; NM_001005361.2; NM_004945.3; NM_001005362.2; NM_001190716.1 | AD; AR                           |
|                                       | <i>FLNA</i>                        | NM_001110556.1; NM_001456.3                                                 | XLD; XLR                         |
|                                       | <i>MYH9</i>                        | NM_002473.5                                                                 | AD                               |
|                                       | <i>PFN1</i>                        | NM_005022.3                                                                 | n. a.                            |
|                                       | <i>TPM4</i>                        | NM_001145160.1; NM_003290.2                                                 | n. a.                            |
|                                       | <i>TUBB1</i>                       | NM_030773.3                                                                 | AD                               |
|                                       | <i>WAS</i>                         | NM_000377.2                                                                 | XLR                              |
|                                       | Granule biogenesis and trafficking | <i>AP3B1</i>                                                                | NM_003664.4                      |
| <i>BLOC1S3</i>                        |                                    | NM_212550.4                                                                 | AR                               |
| <i>BLOC1S6</i>                        |                                    | NM_001311255.1; NM_012388.3                                                 | AR                               |
| <i>DTNBP1</i>                         |                                    | NM_032122.4; NM_183040.2; NM_001271668.1; NM_001271669.1                    | AR                               |
| <i>HPS1</i>                           |                                    | NM_000195.4                                                                 | AR                               |
| <i>HPS3</i>                           |                                    | NM_032383.4                                                                 | AR                               |
| <i>HPS4</i>                           |                                    | NM_022081.5                                                                 | AR                               |
| <i>HPS5</i>                           |                                    | NM_181507.1                                                                 | AR                               |
| <i>HPS6</i>                           |                                    | NM_024747.5                                                                 | AR                               |
| <i>LYST</i>                           |                                    | NM_000081.3                                                                 | AR                               |
| <i>NBEA</i>                           |                                    | NM_015678.4                                                                 | n. a.                            |
| <i>NBEAL2</i>                         |                                    | NM_015175.2                                                                 | AR                               |
| <i>STXBP2</i>                         |                                    | NM_001272034.1; NM_006949.3; NM_001127396.2                                 | AR                               |
| <i>VIPAS39</i>                        |                                    | NM_001193314.1; NM_001193316.1                                              | AR                               |
| <i>VPS33B</i>                         |                                    | NM_018668.4                                                                 | AR                               |

## High-throughput sequencing for genetic classification of platelet disorders

|                              |                   |                                                                |                          |
|------------------------------|-------------------|----------------------------------------------------------------|--------------------------|
| Membrane receptor signalling | <i>CD36</i>       | NM_001001548.2                                                 | AR                       |
|                              | <i>CLEC1B</i>     | NM_016509.3                                                    | n. a.                    |
|                              | <i>FERMT3</i>     | NM_178443.2                                                    | AR                       |
|                              | <i>GP1BA</i>      | NM_000173.6                                                    | AD; AR                   |
|                              | <i>GP1BB</i>      | NM_000407.4                                                    | AR                       |
|                              | <i>GP5</i>        | NM_004488.2                                                    | n. a.                    |
|                              | <i>GP6</i>        | NM_001083899.2                                                 | AR                       |
|                              | <i>GP9</i>        | NM_000174.4                                                    | AR                       |
|                              | <i>ITGA2B</i>     | NM_000419.4                                                    | AD; AR                   |
|                              | <i>ITGB3</i>      | NM_000212.2                                                    | AD; AR                   |
|                              | <i>P2RY1</i>      | NM_002563.4                                                    | n. a.                    |
|                              | <i>P2RY12</i>     | NM_022788.4                                                    | AR                       |
|                              | <i>PAR1 (F2R)</i> | NM_001992.4                                                    | n. a.                    |
|                              | <i>PLA2G4A</i>    | NM_024420.2                                                    | n. a.                    |
|                              | <i>SRC</i>        | NM_198291.2                                                    | AD                       |
|                              | <i>SYK</i>        | NM_003177.6                                                    | n. a.                    |
|                              | Other pathways    | <i>TBXA2R</i>                                                  | NM_201636.2; NM_001060.5 |
| <i>ANO6</i>                  |                   | NM_001204803.1; NM_001142679.1; NM_001025356.2; NM_001142678.1 | AR                       |
| <i>COL1A1</i>                |                   | NM_000088.3                                                    | AD                       |
| <i>CYCS</i>                  |                   | NM_018947.5                                                    | AD                       |
| <i>ORAI1</i>                 |                   | NM_032790.3                                                    | AD; AR                   |
| <i>PLAU</i>                  |                   | NM_001145031.2; NM_002658.4                                    | AD                       |
| <i>PLAUR</i>                 |                   | NM_002659.3; NM_001005376.2                                    | n. a.                    |
| <i>STIM1</i>                 |                   | NM_001277961.1; NM_001277962.1                                 | AD; (AR)                 |

<sup>A</sup> Except for somatic mutations; <sup>B</sup> Genes with additional sequencing of non-coding regions.

Abbreviations: AD: autosomal-dominant; AR: autosomal-recessive; n. a.: not available; XLD: X-linked dominant; XLR: X-linked recessive.

### Supplementary Table 2. Detection of variants previously identified by Sanger sequencing.

| Control | Age  | Sex | Diagnosis                            | Gene          | Status   | Detected variant                              | Reference |
|---------|------|-----|--------------------------------------|---------------|----------|-----------------------------------------------|-----------|
| 1       | 2 m  | m   | Wiskott-Aldrich syndrome             | <i>WAS</i>    | hem      | c.631C>T, p.R211*                             |           |
| 2       | 5 m  | f   | TAR syndrome                         | <i>RBM8A</i>  | comp het | IVS67+32G>C (first intron TAR SNP) + deletion | (41, 42)  |
| 3       | 17 d | f   | Leukocyte-adhesion deficiency type 3 | <i>FERMT3</i> | hom      | p.Q533* (Exon 13)                             | (27)      |
| 4       | 14 y | f   | ADP receptor defect                  | <i>P2YR12</i> | het      | c.834T>G, p.Y278*                             |           |
| 5       | 3 m  | m   | MYH9-related disorder                | <i>MYH9</i>   | het      | c.4270G>A, p.D1424N                           |           |

Abbreviations: ADP: adenosine diphosphate; comp het: compound-heterozygous; d: days; f: female; hem: hemizygous; het: heterozygous; hom: homozygous; IVS: intervening sequence; m (age): months; m (sex): male; SNP: single nucleotide polymorphism; TAR: thrombocyto-penia-absent radius syndrome; y: years.
